# Supplementary material
Source: PubMed Central journal article supplement (PMC4813557)
Supplement: 10.1074_M115.695320_jbc.M115.695320-1.pdf [file 10.1074_M115.695320_jbc.M115.695320-1.pdf]

# Supporting Information

## Characterization of a Unique Pathway for 4-Cresol Catabolism Initiated by Phosphorylation in *Corynebacterium glutamicum*

Lei Du<sup>1,2</sup>, Li Ma<sup>1</sup>, Feifei Qi<sup>1</sup>, Xianliang Zheng<sup>1,2</sup>, Chengying Jiang<sup>3</sup>, Ailei Li<sup>4</sup>, Xiaobo Wan<sup>4</sup>, Shuang-Jiang Liu<sup>3\*</sup>, Shengying Li<sup>1\*</sup>

<sup>1</sup>CAS Key Laboratory of Biofuels, Shandong Provincial Key Laboratory of Synthetic Biology, and

<sup>4</sup>CAS Key Laboratory of Bio-based Materials at Qingdao Institute of Bioenergy and Bioprocess Technology, Chinese Academy of Sciences, Qingdao, Shandong 266101, China

<sup>2</sup>University of Chinese Academy of Sciences, Beijing 100049, China

<sup>3</sup>State Key Laboratory of Microbial Resources, and Environmental Microbiology and Biotechnology Research Center at Institute of Microbiology, Chinese Academy of Sciences, Beijing 100101, China

Running title: *The 4-Cresol Catabolic Pathway Initiated by Phosphorylation*

\*To whom correspondence may be addressed. E-mail: lishengying@qibebt.ac.cn (Li S.), liusj@im.ac.cn (Liu S.-J.)

**Keywords:** 4-cresol, biodegradation, *Corynebacterium glutamicum*, cytochrome P450 monooxygenase, phosphorylation

## Table of Contents

|                                  |      |
|----------------------------------|------|
| Supporting Information Text..... | S-3  |
| Table S1 .....                   | S-4  |
| Table S2 .....                   | S-5  |
| Figure S1.....                   | S-6  |
| Figure S2.....                   | S-6  |
| Figure S3.....                   | S-7  |
| Figure S4.....                   | S-7  |
| Figure S5.....                   | S-8  |
| Figure S6.....                   | S-8  |
| Figure S7.....                   | S-9  |
| Figure S8.....                   | S-9  |
| Figure S9.....                   | S-10 |
| Figure S10.....                  | S-10 |
| Figure S11 .....                 | S-11 |
| Figure S12.....                  | S-11 |
| Figure S13.....                  | S-12 |
| Figure S14.....                  | S-12 |
| Figure S15.....                  | S-12 |
| Figure S16.....                  | S-13 |
| Figure S17.....                  | S-13 |
| Figure S18.....                  | S-13 |
| Figure S19.....                  | S-14 |
| Figure S20.....                  | S-14 |
| Figure S21.....                  | S-14 |
| Figure S22.....                  | S-15 |
| Figure S23.....                  | S-15 |
| Figure S24.....                  | S-15 |
| Figure S25.....                  | S-16 |

### Supporting Information Text

**Synthesis of diethyl (4-formylphenyl) phosphate.** To a solution of 4-hydroxybenzyl aldehyde (2.3 g, 19 mmol) dissolved in carbon tetrachloride (20 mL) was added diethyl phosphite (2.9 mL, 23 mmol) at 0 °C under argon atmosphere. Triethylamine (3.2 mL, 23 mmol) was carefully added drop-wise to the mixture by using a dropping funnel. The mixture was stirred overnight at room temperature. Water (50 mL) was added and the organic layer was separated. The organic layer was washed twice with dilute hydrochloric acid (2 × 25 mL), four times with dilute sodium hydroxide solution (4 × 25 mL), and twice with brine (2 × 25 mL) before being dried over anhydrous MgSO<sub>4</sub>. Removal of solvent on rotary evaporator gave a crude, which was further purified by silica gel column chromatography using a petroleum ether/ethyl acetate (4/1: v/v) mixture to afford diethyl (4-formylphenyl) phosphate (3.5 g). Yield: 71%.

**Synthesis of diethyl (4-(hydroxymethyl)phenyl) phosphate.** To a solution of diethyl (4-formylphenyl) phosphate (1.5 g, 5.8 mmol) dissolved in absolute ethyl alcohol (20 mL) at 0 °C was added sodium borohydride (0.29 g, 7.5 mmol) portion wise. The reaction mixture was then warmed to room temperature and stirred for 30 min. The reaction was quenched with water (10 mL). Ethanol was evaporated and the resulting mixture was extracted with CH<sub>2</sub>Cl<sub>2</sub> (2 × 30 mL). The extract was washed with brine (30 mL), and dried over anhydrous MgSO<sub>4</sub>. Removal of solvent on rotary evaporator gave a crude, which was further purified by silica gel column chromatography using a petroleum ether/ethyl acetate (1/2: v/v) mixture to afford diethyl (4-(hydroxymethyl)phenyl) phosphate (1.4 g). Yield: 95%.

**Synthesis of compound benzylalcohol-4-phosphate.** Diethyl (4-(hydroxymethyl)phenyl) phosphate (0.74 g, 2.9 mmol) was dissolved in dry CH<sub>2</sub>Cl<sub>2</sub> (25 mL). Then bromotrimethylsilane (3.8 mL, 10 equiv. to phosphate ester) was added to the solution and the mixture was heated to reflux for 18 h under argon atmosphere. The solvent was evaporated and the residue was dissolved in anhydrous methanol (25 mL). The solution was stirred for 30 min at 40 °C. Then the resulting solution was concentrated to give benzylalcohol-4-phosphate (0.53 g). Yield: 90%.

**Synthesis of compound benzylaldehyde-4-phosphate.** The detailed procedures were the same as synthesis of benzylalcohol-4-phosphate with using diethyl (4-formylphenyl) phosphate as the reaction substrate. Yield: 91%.

**Synthesis of diethyl 4-tolyl phosphate.** The detailed procedures were the same as synthesis of diethyl (4-formylphenyl) phosphate with using 4-cresol as the reaction substrate. Yield: 80%.

**Synthesis of compound 4-methylbenzyl phosphate.** The detailed procedures were the same as synthesis of benzylalcohol-4-phosphate with using diethyl 4-tolyl phosphate as the reaction substrate. Yield: 92%.

**Table S1: Strains and plasmids used in this study**

| Strain, plasmid             | genotype/phenotype                                                      | Source                     |
|-----------------------------|-------------------------------------------------------------------------|----------------------------|
| <i>E. coli</i> BL21(DE3)    |                                                                         | Novagen                    |
| <i>E. coli</i> DH5 $\alpha$ |                                                                         | Invitrogen                 |
| <i>C. glutamicum</i> RES167 | restriction-deficient mutant of ATCC13032, $\Delta(cglIM-cglIR-cglIIR)$ | Li T, <i>et al.</i> , 2014 |
| pET28b                      | expression vector                                                       | Novagen                    |
| pET28b- <i>creC</i>         | pET28b derivative for expression of <i>creC</i>                         | Present study              |
| pET28a- <i>creD</i>         | pET28a derivative for expression of <i>creD</i>                         | Li T, <i>et al.</i> , 2014 |
| pET28a- <i>creE</i>         | pET28a derivative for expression of <i>creE</i>                         | Li T, <i>et al.</i> , 2014 |
| pET28a- <i>creF</i>         | pET28a derivative for expression of <i>creF</i>                         | Li T, <i>et al.</i> , 2014 |
| pET28a- <i>creG</i>         | pET28a derivative for expression of <i>creG</i>                         | Li T, <i>et al.</i> , 2014 |
| pET28b- <i>creH</i>         | pET28b derivative for expression of <i>creH</i>                         | Present study              |
| pET28b- <i>creI</i>         | pET28b derivative for expression of <i>creI</i>                         | Present study              |
| pET28a- <i>creJ</i>         | pET28a derivative for expression of <i>creJ</i>                         | Li T, <i>et al.</i> , 2014 |

**Table S2: Primers used in this study**

| <b>Primers</b> | <b>Sequences (5'-3')</b>          | <b>Description</b>                         |
|----------------|-----------------------------------|--------------------------------------------|
| <b>creC-F</b>  | CCGCCATATGCCGATGAATGCTGCAACCA     | To construct pET28b- <i>creC</i>           |
| <b>creC-R</b>  | GCGCGGATCCGTGTTTAGCTGAGAACTTTCAG  | To construct pET28b- <i>creC</i>           |
| <b>creD-F</b>  | GACACATATGACTCGCAGTAATTTACCCGC    | To construct pET28b- <i>creD</i>           |
| <b>creD-R</b>  | CGGAATTCGAGAAGCACGCCTGGTTG        | To construct pET28b- <i>creD</i>           |
| <b>creE-F</b>  | GACACATATGAATACTTCAGCTGAAACTGGA   | To construct pET28b- <i>creE</i>           |
| <b>creE-R</b>  | GGAGCTCTCCCAAGCGGGTAAAT           | To construct pET28b- <i>creE</i>           |
| <b>creF-F</b>  | GCGCCATATG AAGATCATGTCTACTATTCATT | To construct pET28b- <i>creF</i>           |
| <b>creF-R</b>  | TCATAAGCTT TCACACTTGCCTTCTGGCG    | To construct pET28b- <i>creF</i>           |
| <b>creG-F</b>  | GACACATATGCCTAGTCCACGCACTGTTC     | To construct pET28b- <i>creG</i>           |
| <b>creG-R</b>  | CGGAATTCAGTAGACATGATCTTCTCCTTAG   | To construct pET28b- <i>creG</i>           |
| <b>creH-F</b>  | GCGCCATATGGCTAATAAATCTTTCCCAAGCCC | To construct pET28b- <i>creH</i>           |
| <b>creH-R</b>  | ACGCGGATCCGTGGACTAGGCATGTGTATC    | To construct pET28b- <i>creH</i>           |
| <b>creI-F</b>  | TCGCCATATGGGAGACACCATGACCAACAGT   | To construct pET28b- <i>creI</i>           |
| <b>creI-R</b>  | GCCCAAGCTTAACGAGGTAGTACGGGTACA    | To construct pET28b- <i>creI</i>           |
| <b>creJ-R</b>  | CGTGCCATGGGCACAATGACTTCCAGACT     | To construct pET28b- <i>creJ</i>           |
| <b>creJ-R</b>  | CGGGAAGCTTAGCGTTCCAAGTCACGGGAA    | To construct pET28b- <i>creJ</i>           |
| <b>CB-F</b>    | TCTCGGTGGCTTGGTATT                | RT-PCR. To amplify region a in Figure S11. |
| <b>CB-R</b>    | AAGATTCGGCGATGACTG                | RT-PCR. To amplify region a in Figure S11. |
| <b>DC-F</b>    | GGCTTCTAGCTCATGGTTCG              | RT-PCR. To amplify region b in Figure S11. |
| <b>DC-R</b>    | AATGGGCGGATGTCTTCG                | RT-PCR. To amplify region b in Figure S11. |
| <b>DE-F</b>    | CTCAAACACTACAAATTGCAGGAC          | RT-PCR. To amplify region c in Figure S11. |
| <b>DE-R</b>    | CGGAGATGATTCCGGCTCT               | RT-PCR. To amplify region c in Figure S11. |
| <b>FE-F</b>    | GGCGGTTCCCTTATCGTGT               | RT-PCR. To amplify region d in Figure S11. |
| <b>FE-R</b>    | GATCCGTCGTCGTTCTTTT               | RT-PCR. To amplify region d in Figure S11. |
| <b>GF-F</b>    | ACCAGGGTGCTTGCTAAA                | RT-PCR. To amplify region e in Figure S11. |
| <b>GF-R</b>    | GGACTGCGGTCTCCATTA                | RT-PCR. To amplify region e in Figure S11. |
| <b>HG-F</b>    | AAAACCGGCGATTACCTC                | RT-PCR. To amplify region f in Figure S11. |
| <b>HG-R</b>    | GCTCTTTAGCAAGCACCT                | RT-PCR. To amplify region f in Figure S11. |
| <b>IH-F</b>    | AAGCCCCTTGATGAAGAA                | RT-PCR. To amplify region g in Figure S11. |
| <b>IH-R</b>    | TGAATCGCAGAACCAGAAT               | RT-PCR. To amplify region g in Figure S11. |
| <b>JI-F</b>    | TGGTTTCGGCATCCACTA                | RT-PCR. To amplify region h in Figure S11. |
| <b>JI-R</b>    | GAAGCCCAGCATTTACGG                | RT-PCR. To amplify region h in Figure S11. |
| <b>RJ-F</b>    | CGCTATCTCCCGATCCTT                | RT-PCR. To amplify region i in Figure S11. |
| <b>RJ-R</b>    | AACATCACTGGCTCTTCCT               | RT-PCR. To amplify region i in Figure S11. |
| <b>R-F</b>     | CGATGCGGTATAGAACGA                | RT-PCR. To amplify region j in Figure S11. |
| <b>R-R</b>     | GAAACGAGACGGTGGGTG                | RT-PCR. To amplify region j in Figure S11. |

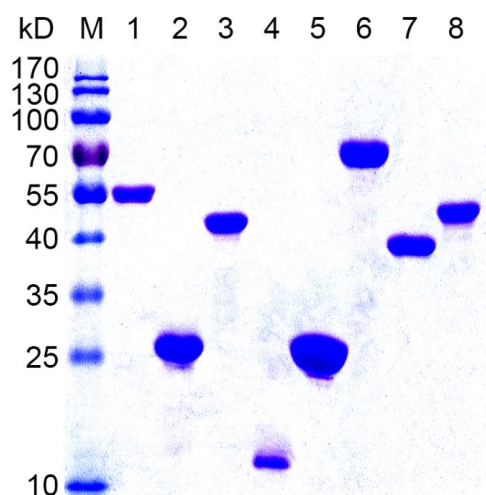

**Figure S1. SDS-PAGE analysis of purified proteins.** M, marker; 1, CreC; 2, CreD; 3, CreE; 4, CreF; 5, CreG; 6, CreH; 7, CreI; 8, CreJ.

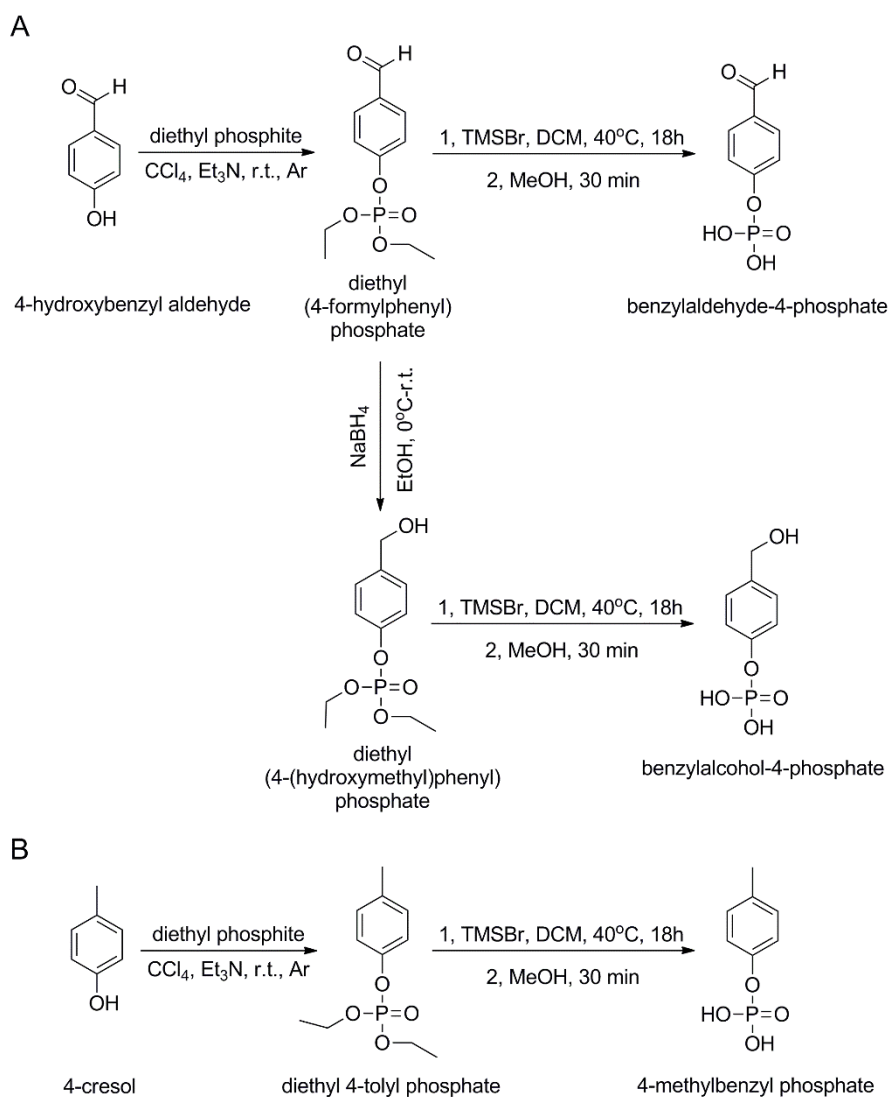

**Figure S2. Chemical synthesis routes of 4-methylbenzyl phosphate, benzylalcohol-4-phosphate and benzaldehyde-4-phosphate.**

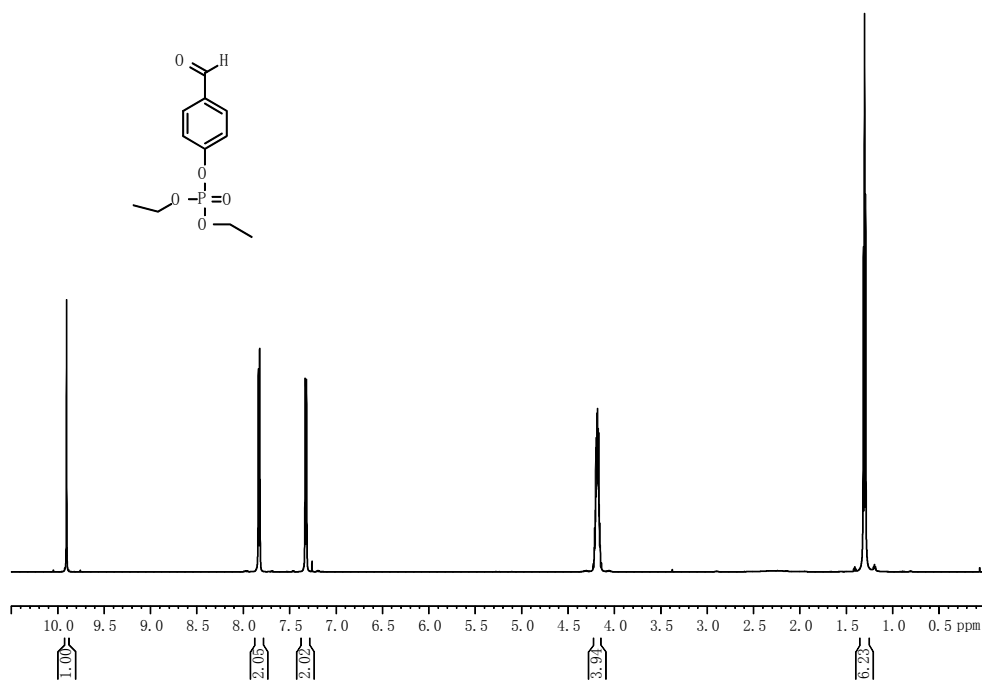

Figure S3. <sup>1</sup>H NMR spectrum of diethyl (4-formylphenyl) phosphate in CDCl<sub>3</sub>.

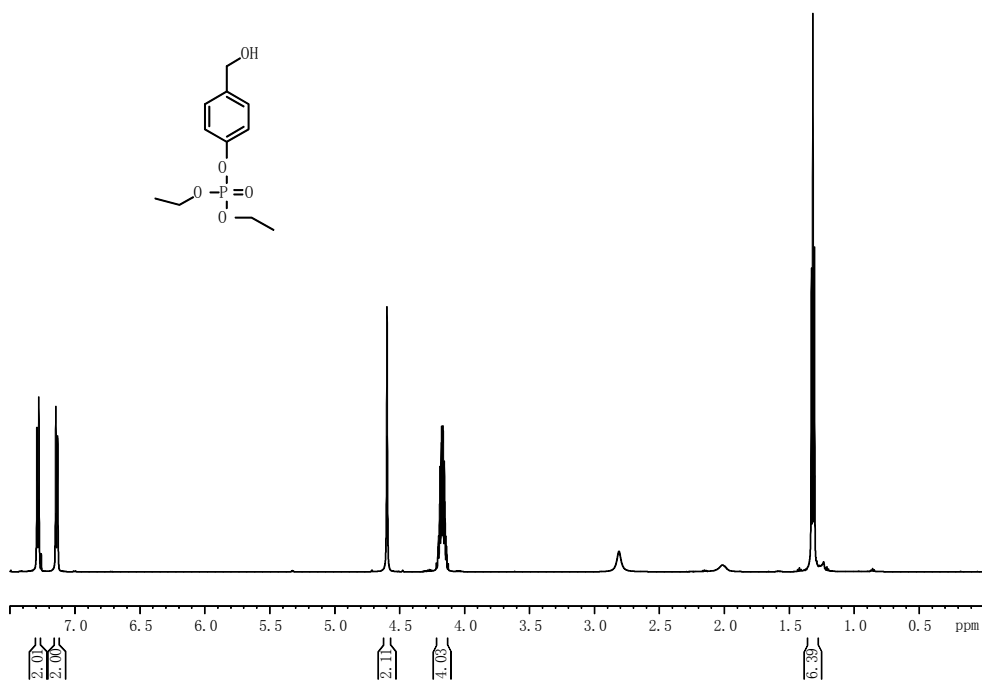

Figure S4. <sup>1</sup>H NMR spectrum of diethyl (4-(hydroxymethyl)phenyl) phosphate in CDCl<sub>3</sub>.

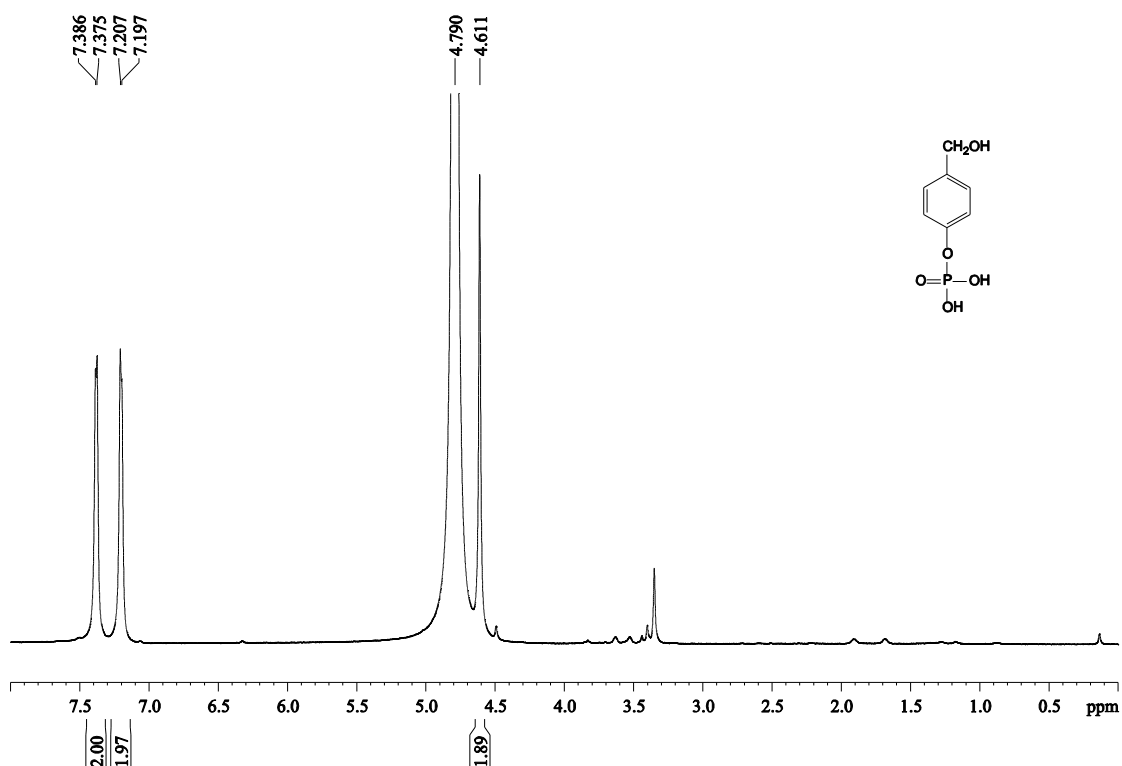

Figure S5.  $^1\text{H}$  NMR spectrum of benzylalcohol-4-phosphate in  $\text{D}_2\text{O}$ .

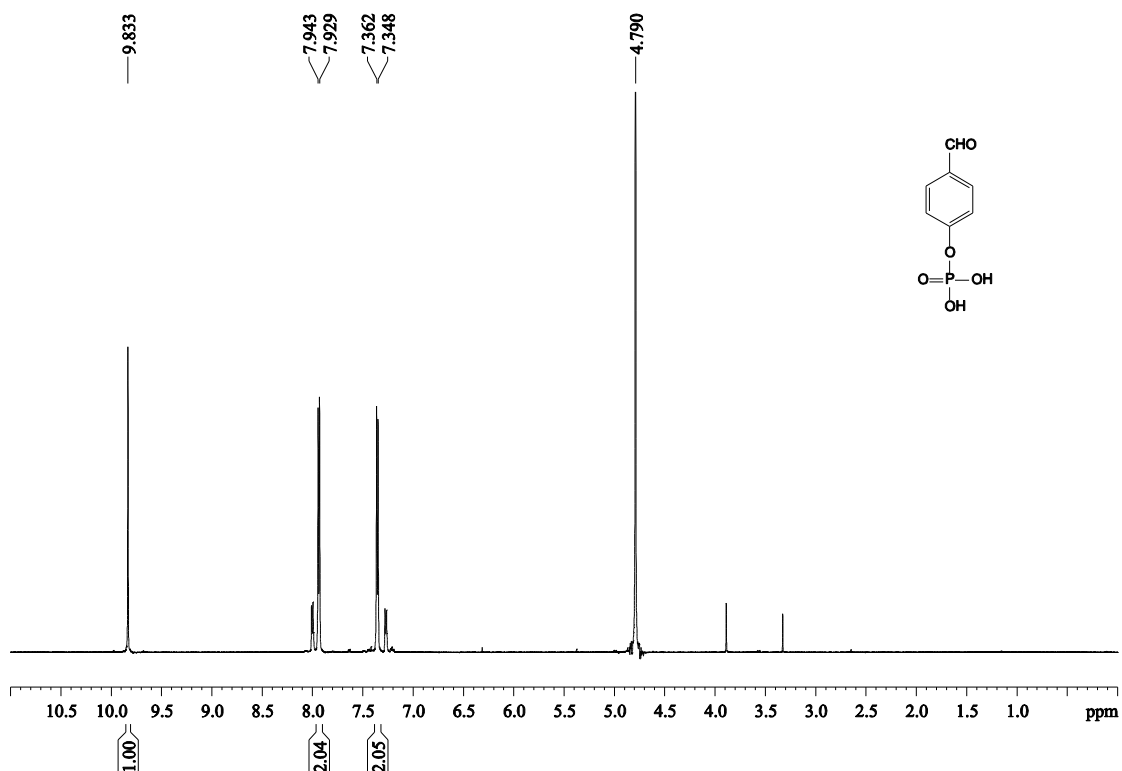

Figure S6.  $^1\text{H}$  NMR spectrum of benzylaldehyde-4-phosphate in  $\text{D}_2\text{O}$ .



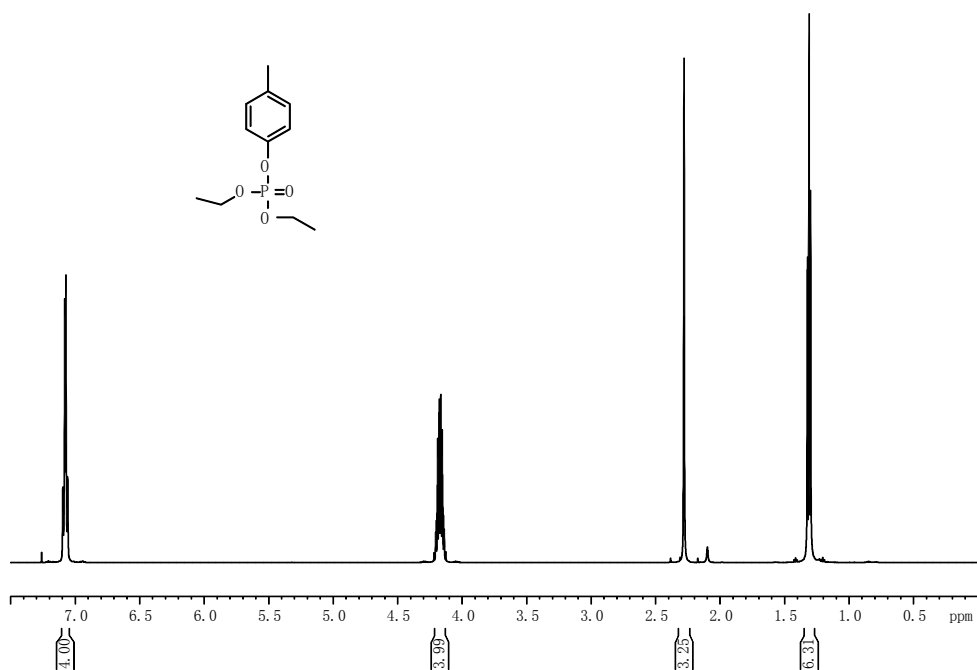

**Figure S7.**  $^1\text{H}$  NMR spectrum of diethyl 4-tolyl phosphate in  $\text{CDCl}_3$ .

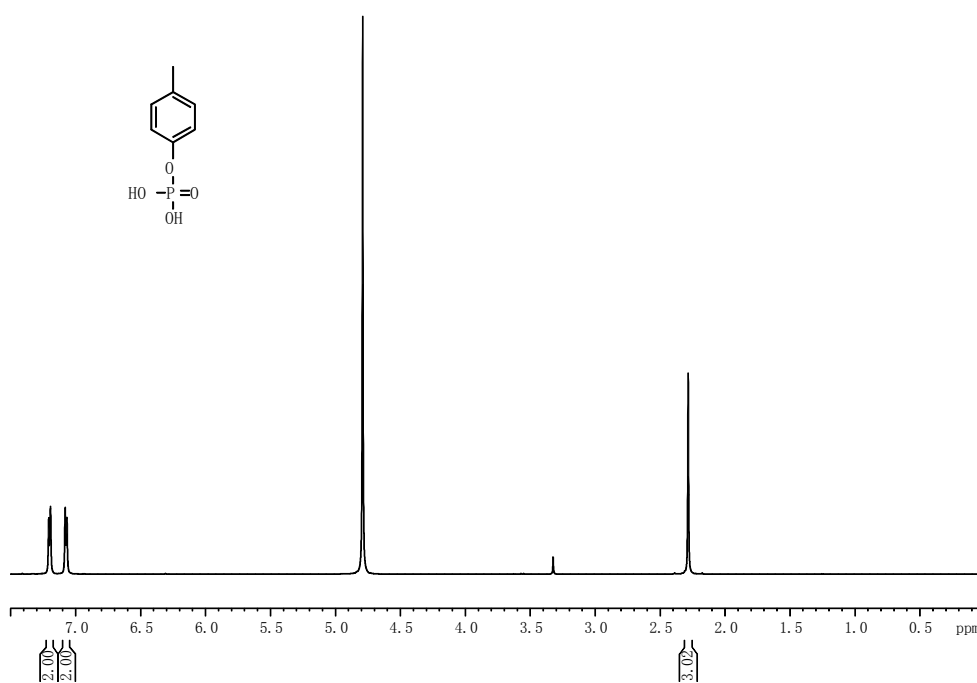

**Figure S8.**  $^1\text{H}$  NMR spectrum of 4-methylbenzyl phosphate in  $\text{D}_2\text{O}$ .

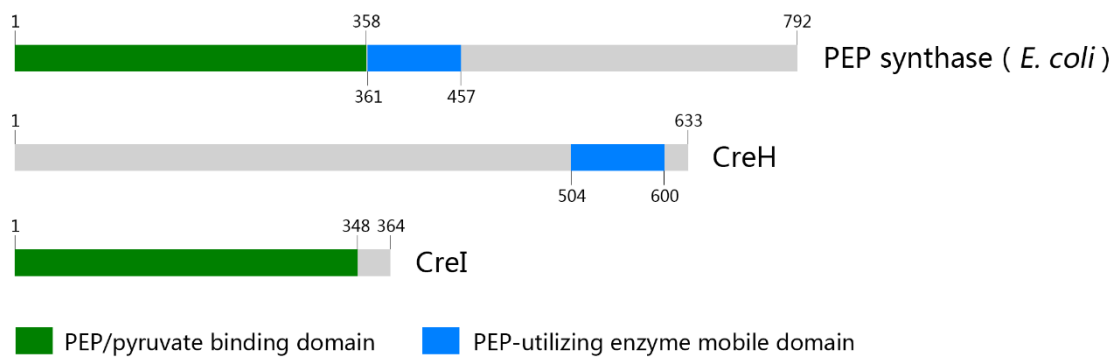

**Figure S9. Conserved domain analysis of the PEP synthase of *E. coli*, CreH and CreI.**

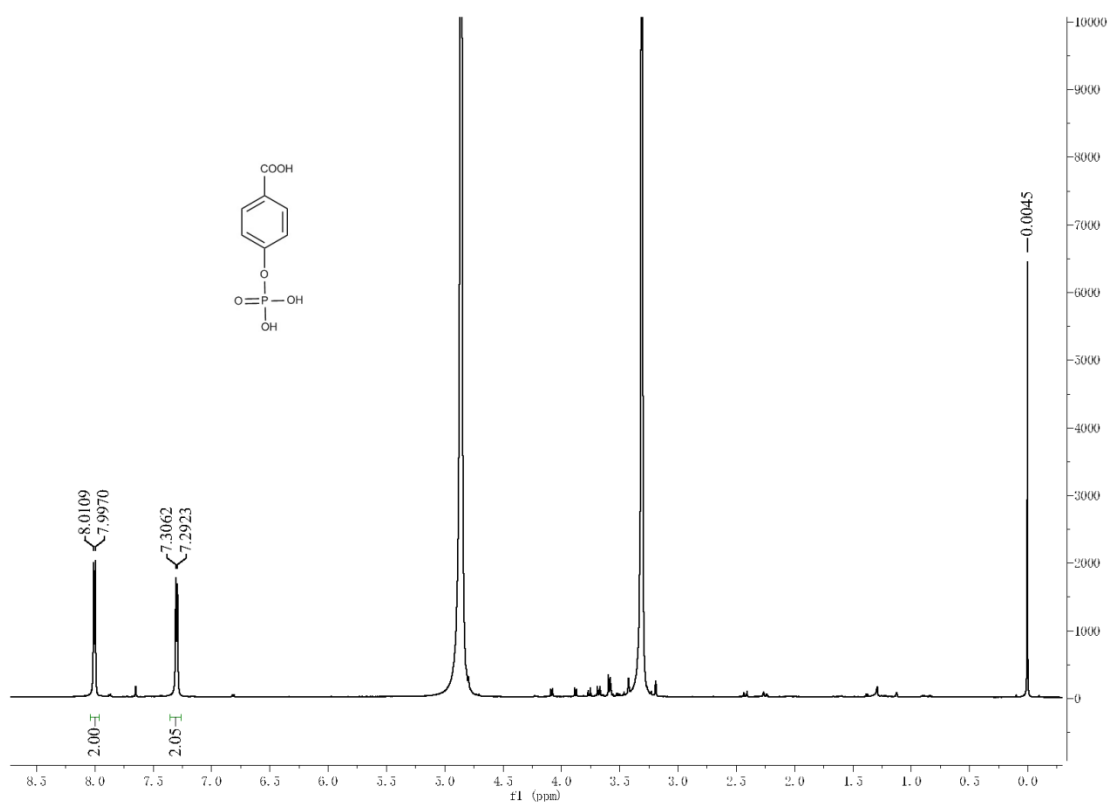

**Figure S10. <sup>1</sup>H NMR spectrum of benzoate-4-phosphate in D<sub>2</sub>O.**

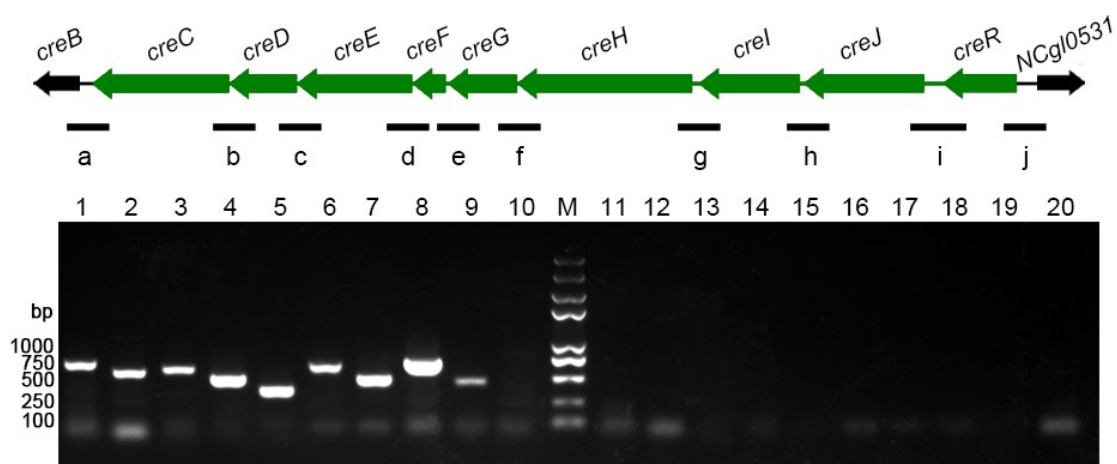

**Figure S11. Results of RT-PCR assays.** The cDNA prepared from *Corynebacterium glutamicum* RES167 grown in LB broth containing 2 mM 4-cresol for 48 h was used as template. Black bars below the gene cluster (a to j) represent the locations of fragments amplified from RT-PCR assays. Lanes 1-10 show the a-j RT-PCR products. Lanes 11-20 were negative controls with mRNA as PCR template. M: Molecular size standard.

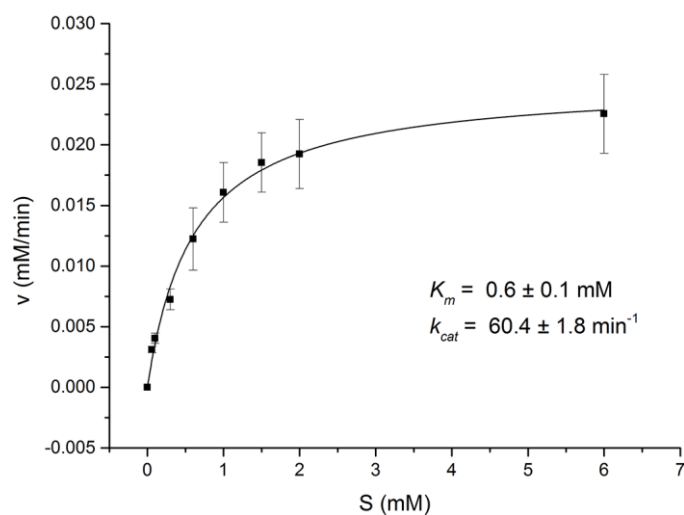

**Figure S12. The kinetic curve of CreHI with 4-cresol as substrate.** ( $[\text{CreH}] = [\text{CreI}] = 1.7 \mu\text{M}$ )

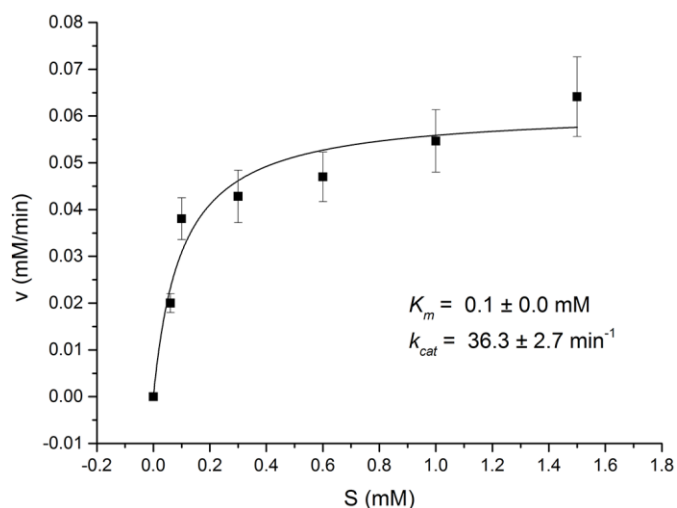

**Figure S13.** The kinetic curve of CreHI with 4-hydroxybenzyl alcohol as substrate. ( $[\text{CreH}] = [\text{CreI}] = 1.7 \mu\text{M}$ )

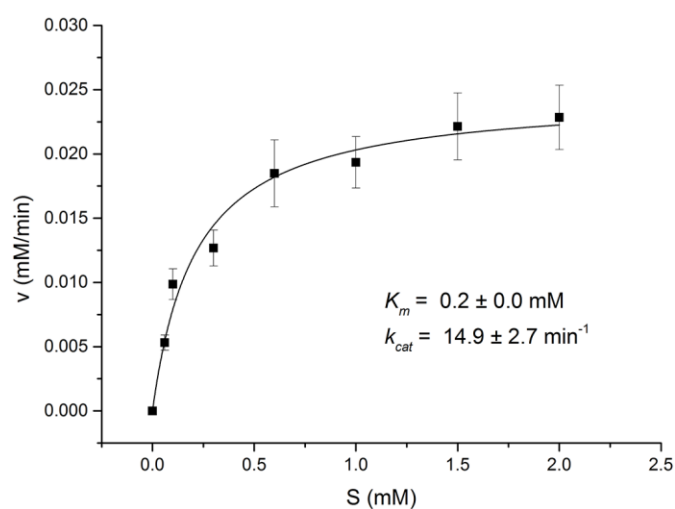

**Figure S14.** The kinetic curve of CreHI with 4-hydroxybenzyl aldehyde as substrate. ( $[\text{CreH}] = [\text{CreI}] = 1.7 \mu\text{M}$ )

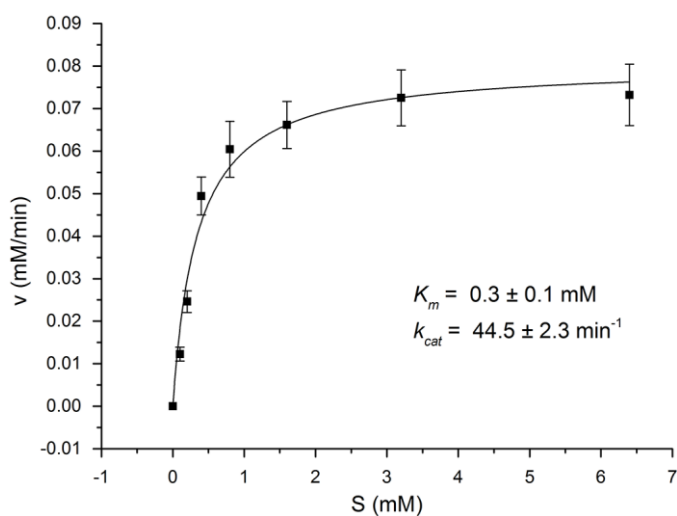

**Figure S15.** The kinetic curve of CreJEF with 4-methylbenzyl phosphate as substrate. ( $[\text{CreJ}] = [\text{CreE}] = [\text{CreF}] = 0.8 \mu\text{M}$ )

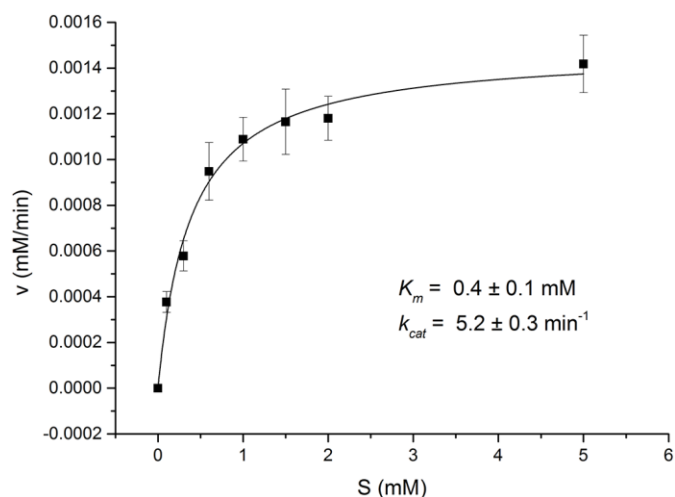

**Figure S16.** The kinetic curve of CreJEF with benzylalcohol-4-phosphate as substrate. ( $[\text{CreJ}] = [\text{CreE}] = [\text{CreF}] = 0.8 \mu\text{M}$ )

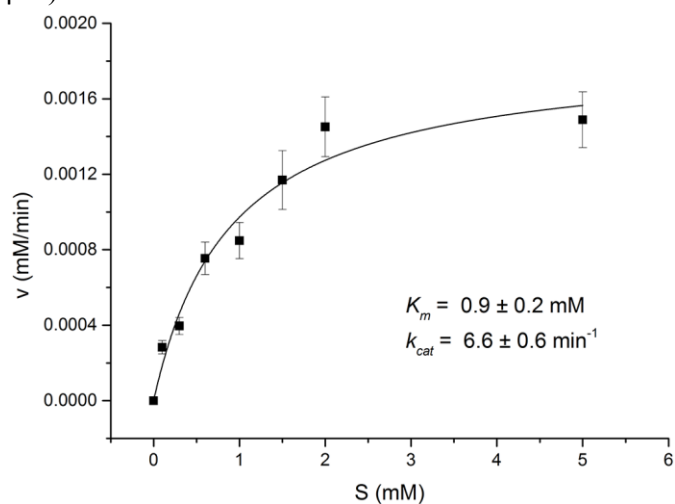

**Figure S17.** The kinetic curve of CreJEF with benzylaldehyde-4-phosphate as substrate. ( $[\text{CreJ}] = [\text{CreE}] = [\text{CreF}] = 0.8 \mu\text{M}$ )

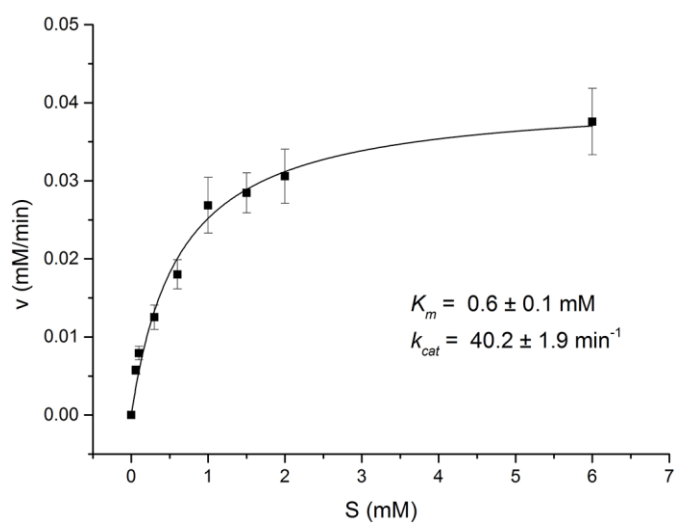

**Figure S18.** The kinetic curve of CreD with 4-methylbenzyl phosphate as substrate. ( $[\text{CreD}] = 1.0 \mu\text{M}$ )

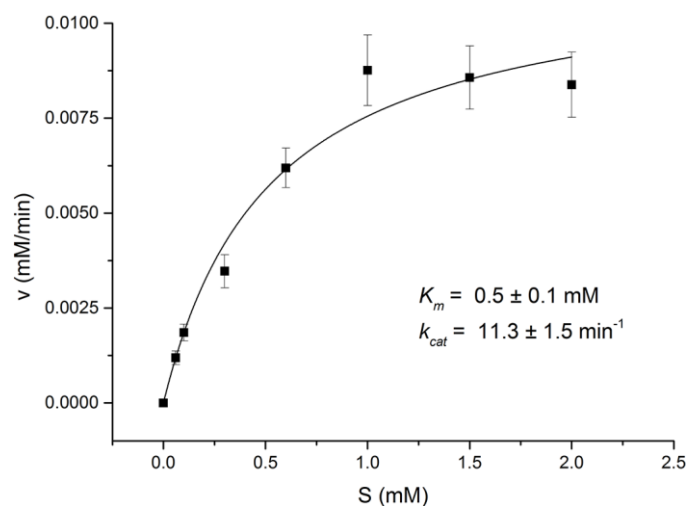

**Figure S19.** The kinetic curve of CreD with benzylalcohol-4-phosphate as substrate. ([CreD] = 1.0  $\mu\text{M}$ )

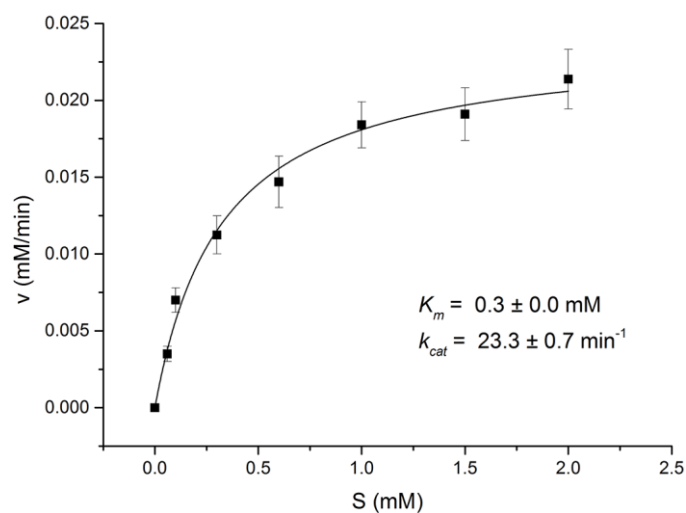

**Figure S20.** The kinetic curve of CreD with benzylaldehyde-4-phosphate as substrate. ([CreD] = 1.0  $\mu\text{M}$ )

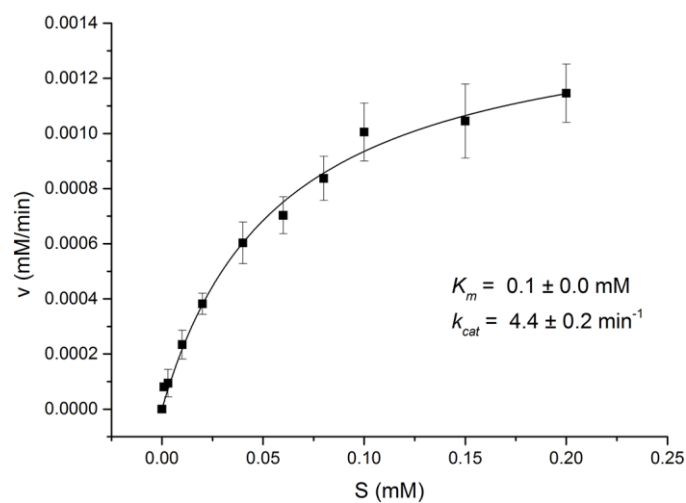

**Figure S21.** The kinetic curve of CreC with 4-hydroxybenzyl aldehyde as substrate. ([CreC] = 0.3  $\mu\text{M}$ )

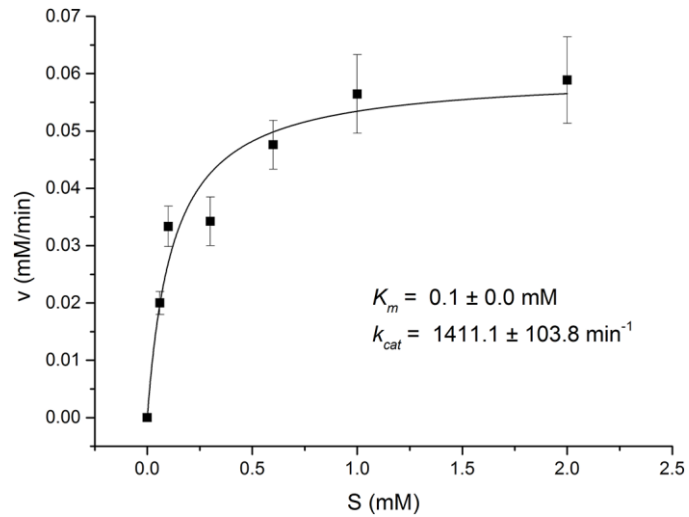

**Figure S22.** The kinetic curve of CreC with benzylaldehyde-4-phosphate as substrate. ( $[\text{CreC}] = 0.04 \mu\text{M}$ )

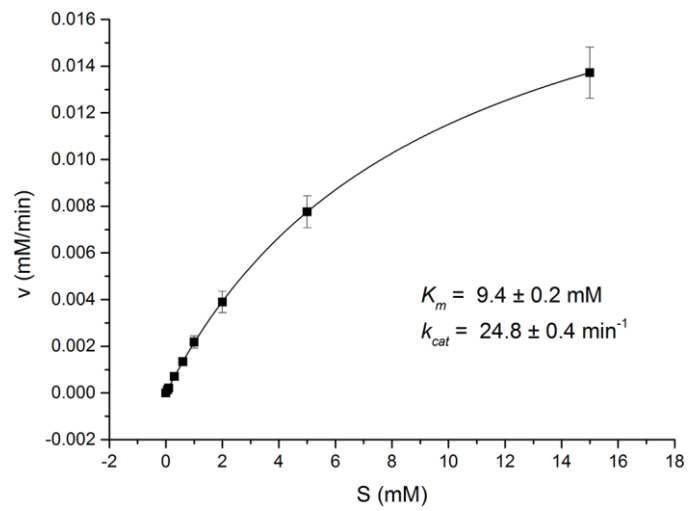

**Figure S23.** The kinetic curve of CreG with 4-hydroxybenzyl alcohol as substrate. ( $[\text{CreG}] = 0.9 \mu\text{M}$ )

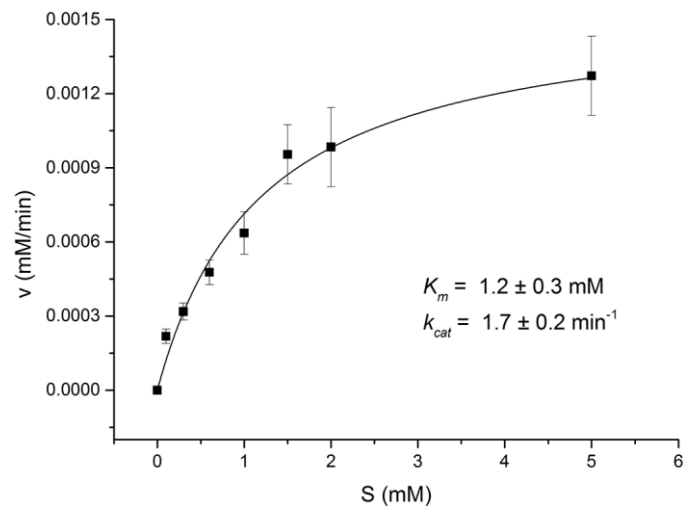

**Figure S24.** The kinetic curve of CreG with benzylalcohol-4-phosphate as substrate. ( $[\text{CreG}] = 0.9 \mu\text{M}$ )

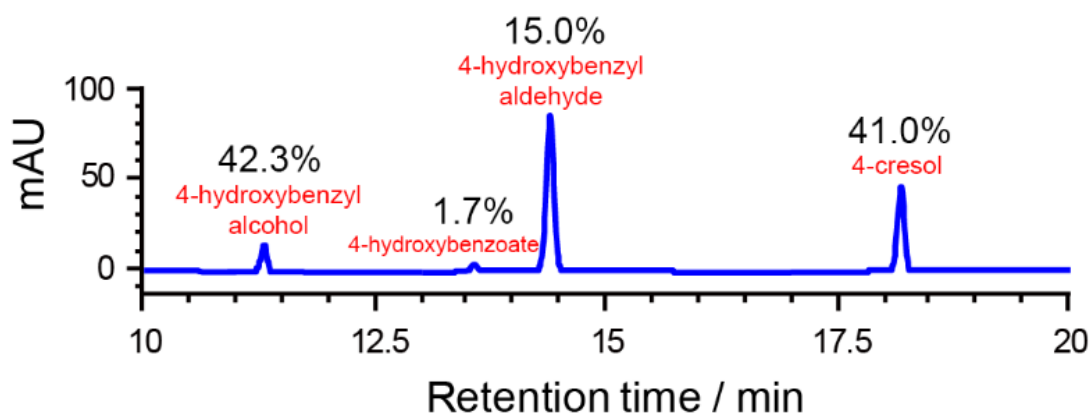

**Figure S25. HPLC analysis of the competition assay between CreJEF and CreD.** In this assay, 1 mM 4-methylbenzyl phosphate was used as substrate, and all involved enzymes were normalized to the same concentration of 12.0  $\mu$ M. Assays were carried out in 100 mM Tris-HCl buffer (pH 8.0) at 30°C for 120 min. Each compound was quantified based on area under curve of corresponding HPLC peak relative to that of authentic standard compound with known concentration. Due to distinct extinction coefficients, the peak intensity of compounds do not necessarily reflect relative amounts shown in percentage.
